# Supplementary material for: Ishophloroglucin A Isolated from Ishige okamurae Suppresses Melanogenesis Induced by α-MSH: In Vitro and In Vivo
Source: PubMed Central journal article supplement (PMC7551695; doi:10.3390/md18090470), 2020-09-17
Supplement: marinedrugs-18-00470-s001.pdf [file marinedrugs-18-00470-s001.pdf]

Supplementary Material

## **Ishophloroglucin A Isolated from *Ishige okamurae* Suppresses Melanogenesis Induced by $\alpha$ -MSH: In Vitro and In Vivo**

Xining Li <sup>1</sup>, Hye-Won Yang <sup>1</sup>, Yunfei Jiang <sup>1</sup>, Jae-Young Oh <sup>1</sup>, You-Jin Jeon <sup>1,2,\*</sup> and Bomi Ryu <sup>1,\*</sup>

<sup>1</sup> Department of Marine Life Sciences, Jeju National University, Jeju 63243, Korea; lixn887@nenu.edu.cn (X.L.); koty221@naver.com (H.-W.Y.); jiangyunfei0310@gmail.com (Y.J.); oiy0724@naver.com (J.-Y.O.)

<sup>2</sup> Marine Science Institute, Jeju National University, Jeju 63333, Korea

\* Correspondence: youjinj@jejunu.ac.kr (Y.-J.J.); bmryu@jejunu.ac.kr (B.R.); Tel.: +82-64-754-3475 (Y.-J.J. & B.R.)

**Figure S1.** Structure of Ishophloroglucin A (IPA, A) and Diphlorethohydroxycarmalol (DPHC, B) isolated from *Ishige okamurae*

**Figure S2.** Effects of  $\alpha$ -MSH and arbutin on the cell viability and melanin content of B16F10 melanoma cells. Cytotoxicity of  $\alpha$ -MSH (A) and arbutin (B) in B16F10 melanoma cells. Cells were incubated with different concentrations of  $\alpha$ -MSH (0.1, 0.3, 1, 3, and 10 nM) and arbutin (10, 30, 100, and 300  $\mu$ M) for 72 h and cell viability was determined by MTT assay. Results are normalized to control. Melanin contents of group of  $\alpha$ -MSH (C) and group of arbutin (D) in B16F10 cells. After 72 h incubation, absorbance was measured at 450 nm. Melanin contents are expressed as percent values. The data are shown as means  $\pm$ SD of independent experiments; ns, not significant; \* $p$  < 0.05, \*\* $p$  < 0.01, and \*\*\* $p$  < 0.001 compared to no sample treated group.

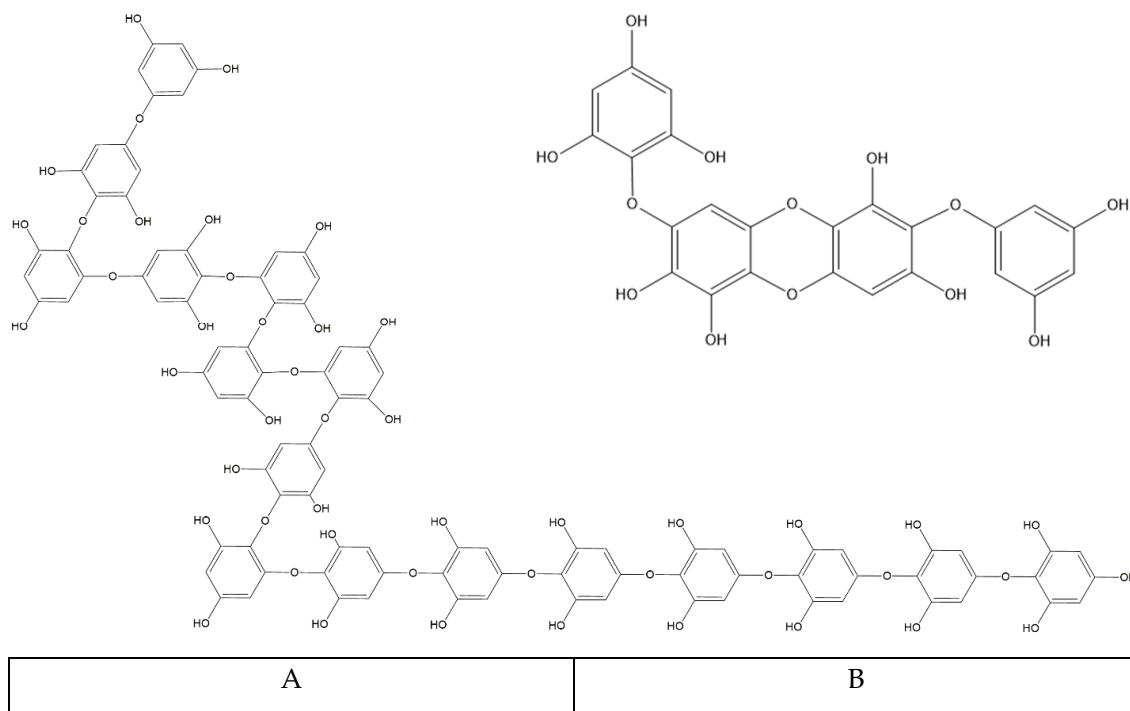

Figure S1.

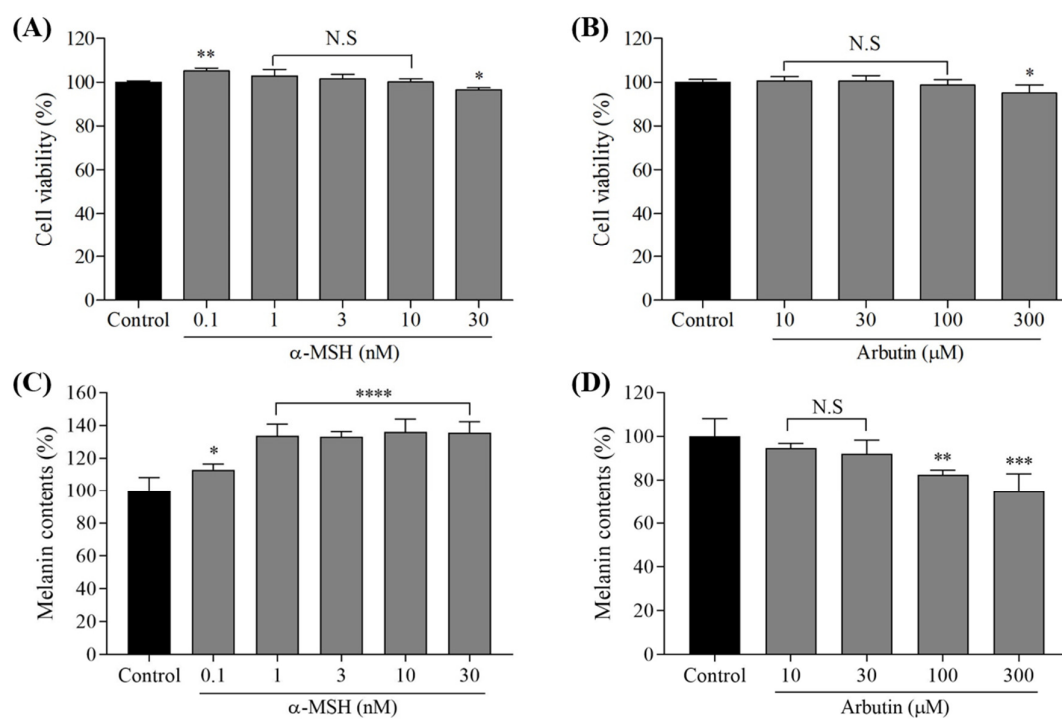

Figure S2.

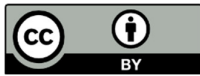

© 2020 by the authors. Licensee MDPI, Basel, Switzerland. This article is an open access article distributed under the terms and conditions of the Creative Commons Attribution (CC BY) license (<http://creativecommons.org/licenses/by/4.0/>).
